20 *modestus* population in Belgium. Collection of *Cx. modestus* mosquitoes at the same  
21 locations in 2020, confirmed the establishment in the region.

22 Haplotype network analysis of the COI sequences for *Cx. modestus* showed that the Belgian  
23 population is rather diverse, suggesting that it may have been established in Belgium for  
24 some time. The Belgian *Cx. modestus* population was most closely related to populations  
25 from the UK and Germany. Characterization of the virome of the collected mosquitoes  
26 resulted in the identification of at least 33 eukaryotic viral species. Nine (near-) complete  
27 genomes belonging to 6 viral species were identified, all of which were closely related to  
28 known viruses.

29 In conclusion, we here report the presence of *Cx. modestus* in the surroundings of Leuven,  
30 Belgium. As this species is known to be a vector of several arboviruses, the implementation  
31 of vector surveillance programs monitoring this species is recommended.

32

### 33 **Importance**

34 *Culex modestus* is a mosquito species that plays a role as a ‘bridge’ vector, being able to transmit  
35 pathogens between birds, as well as from birds to mammals, including humans. In Belgium,  
36 this mosquito species was considered absent, until the finding of one larva in 2018 and  
37 subsequent evidence of a large population in 2019-2020 described here. We collected  
38 mosquitoes in the summer of 2019 and 2020 in the city of Leuven and surroundings. The  
39 mosquito species was identified by morphological and molecular methods, demonstrating the  
40 presence of *Cx. modestus* in this region. The ability of mosquitoes to transmit pathogens can  
41 depend on several factors, one of them being their natural virus composition. Therefore, we  
42 identified the mosquito-specific viruses harboured by Belgian mosquitoes. As *Cx. modestus* is  
43 able to transmit viruses such as West Nile virus and Usutu virus, the establishment of this

44 mosquito species may increase the risk of virus transmission in the region. It is thus advisable  
45 to implement mosquito surveillance programs monitoring this species.

## 46 **Introduction**

47 The *Culex modestus* mosquito species was described for the first time by Eugenio Ficalbi (1889)  
48 in northern Italy (1) and is considered a rare species. In Europe, this species is distributed mainly  
49 in southern and central European countries. Field collections have reported the presence of *Cx.*  
50 *modestus* in France, Spain, Portugal, Germany, Romania, Serbia and Czech Republic; and more  
51 recently, also in more northern countries such as the United Kingdom (UK), Denmark and  
52 Sweden (2–5). In Belgium, this mosquito species was thought to be likely present given its  
53 occurrence in nearby countries (6). Up to now, only one larva has been found in 2018 and  
54 identified as such through molecular methods (7). Recent field studies in the UK have  
55 confirmed two characteristics of *Cx. modestus*: (i) its ornithophilic habit, i.e. feeding on resident  
56 and migratory bird species (8), and (ii) its mammalophilic and anthropophilic feeding  
57 behaviour, showing that *Cx. modestus* is also a major human-biting mosquito species similar to  
58 *Cx. pipiens* (9). Thus, *Cx. modestus* could play a role in nature as a ‘bridge’ vector, being able  
59 to transmit pathogens between birds in an enzootic cycle, as well as from birds to mammals,  
60 including humans, in an epizootic/epidemic cycle.

61 Previous studies on different *Cx. modestus* populations in Europe revealed that this species can  
62 act as a carrier of different pathogens, and likely is able to transmit these pathogens as well. In  
63 the south of France, *Cx. modestus* mosquitoes have been found to serve as amplifying vectors  
64 for seasonal West Nile virus (WNV), introduced by migratory birds (10). *Cx. modestus*  
65 mosquitoes collected in the Danube Delta region (border of Romania and Ukraine) were  
66 positive for *Plasmodium sp.* lineage Donana03 (avian malaria) (11). In addition, a prevalence  
67 of 5.1% of *Trypanosomatids* was detected in the gut of *Cx. modestus* collected in the Czech  
68 Republic between 1998 and 2002 (12). Furthermore, *Cx. modestus* is the vector and reservoir

69 of Lednice virus (LEDV), a rare bunyavirus that causes viremia in wild birds. During the last  
70 sixty years, various European countries have reported the presence of LEDV in their *Cx.*  
71 *modestus* mosquito populations (13). Besides LEDV, also the Tahyna virus (TAHV) has been  
72 isolated from *Cx. modestus* in Czechoslovakia and in France (14).

73 Mosquito surveillance in the UK started focusing on *Cx. modestus* due to its confirmed  
74 establishment and important role in the transmission of WNV and Usutu virus (USUV) (15).  
75 The role in WNV transmission in Europe was demonstrated by the detection of WNV in this  
76 mosquito species during an outbreak in the Sardinia region (Italy) in 2011 (16). During this  
77 outbreak, the circulating virus strains belonged to lineage 1. It was the first report of an Italian  
78 WNV strain that caused clinical signs in the affected birds. The mosquito survey carried out in  
79 this area revealed that these virus strains were found in *Cx. modestus* mosquitoes. During the  
80 mosquito seasons 2015 and 2016, WNV lineage 2 has also been detected in *Cx. modestus*  
81 mosquitoes collected in the Lednice-Valtice Area (in southern Moravia) (17, 18). Regarding  
82 the vector competence of *Cx. modestus* for WNV, this mosquito species was found to be  
83 competent to transmit WNV experimentally. More than 90% of *Cx. modestus* mosquitoes  
84 developed a disseminated infection 14 days after an infectious WNV bloodmeal (19).  
85 Moreover, it is considered an extremely efficient vector, given that the disseminated infection  
86 and the transmission rates reached 89.2% and 54.5% respectively, after 14 incubation days (20).  
87 The USUV has also been detected in field collected *Cx. modestus*, likely co-circulating with  
88 WNV (21). The USUV is another arbovirus with African origin that is principally transmitted  
89 by *Culex* mosquitoes. This virus belongs to the genus *Flavivirus*, as well as dengue, yellow  
90 fever, Zika, Japanese encephalitis and WNV (22). The virus is maintained in an enzootic cycle  
91 between ornithophilic mosquitoes and birds. In Europe, USUV was found by retrospective  
92 analysis of archived tissue samples from bird deaths in the Tuscany region of Italy in 1996 (23).  
93 In 2001, USUV-associated death of blackbirds was reported in Austria (24), Germany and the

94 Netherlands (25, 26). In 2016, numerous wild birds, mainly Eurasian blackbirds (*Turdus*  
95 *merula*), were affected by a USUV outbreak in Belgium in the provinces of Limburg, Antwerp  
96 and Flemish Brabant (27). In 2017, the virus further spread to the west and by the summer of  
97 2018, the whole country was affected (28). Despite the recent USUV outbreaks, it is not known  
98 which mosquito species are the vectors of USUV in Belgium. To gain insight about which  
99 mosquito species might carry clinically relevant viruses, we collected field mosquitoes using  
100 BG-sentinel traps in the city of Leuven and its surroundings in three different environment types  
101 (urban, peri-urban and wetland areas).

102 To unravel the high diversity of mosquito-specific viruses (MSVs) harbored by Belgian  
103 mosquitoes, we performed a metagenomic sequencing approach using the Novel enrichment  
104 technique of VIRomes (NetoVIR) protocol (29). The study of viral diversity in mosquitoes is  
105 important since MSVs have the potential to modulate the vector competence of mosquitoes for  
106 different arboviruses (30). The virome of tropical mosquito species such as *Aedes aegypti* has  
107 been studied extensively. On the other hand, knowledge on the viral diversity in mosquitoes  
108 from more temperate regions is still scarce but increasing. For instance, a recent virome study  
109 identified novel RNA viruses in Swedish mosquitoes (31). However, the virome of mosquitoes  
110 from Western Europe, including Belgium, has not yet been studied. Therefore, we provide a  
111 first glance into the virome of mosquitoes collected in Belgium.

## 112 **Material and Methods**

### 113 **Ethics statement**

114 Permits for peri-urban and wetland mosquito field collections were obtained from the security  
115 responsible of KU Leuven. Permits for field collections in urban habitats were obtained from  
116 the landowners.

117 **Mosquito collections**

118 Adult mosquitoes were trapped with the BG-Sentinel traps (BioGents GmbH, Germany), which  
119 were baited with BG-lure (BioGents GmbH, Germany) and containing around 2 kg of dry ice  
120 in the isolated box for CO<sub>2</sub> production. Two traps were rotated in three different habitat types  
121 (urban (N 50°52'41, E 4°41'21), peri-urban (N 50°51', E 4°41'), and water reservoir wetlands  
122 (N 50°51', E 4°40'), in Leuven and surroundings (Supplementary Figure S1).

123 The parameters to determine each trap location in these habitats were similar to what is  
124 described by Mayi et al. (2020) (32). We followed these criteria and the advice of Prof. dr. ir.  
125 Raf Aerts and his team at the Division Ecology, Evolution and Biodiversity Conservation,  
126 University of Leuven (KU Leuven) on the selection of mosquito collection sites representing  
127 different habitat types.

128 Collections were performed from August to the beginning of October in 2019, when the weather  
129 was good, avoiding strong wind or heavy rain. Every 24 hours, the traps were emptied and  
130 repositioned between sunrise and sunset of the next day. Mosquitoes were individually stored  
131 at -80°C until species identification. A second collection was performed in August of 2020 in  
132 the same geographic locations as described above to confirm the presence of certain species.

133 **Species identification, sample preparation and DNA sequencing**

134 All collected mosquitoes were identified using morphological characters (33). Individual  
135 thoraces were removed using forceps for molecular identification and homogenized in 100 µL  
136 of phosphate-buffered saline (PBS) using tubes with 2.8 mm ceramic beads with a Precellys  
137 Evolution homogenizer. Sample preparation was performed by lysing the homogenate at 100°C  
138 for 10 minutes (34). Tissue debris was removed by centrifugation at 12 000 rpm for 3 minutes,  
139 and 50 µL of supernatant was collected into a new tube. A 710 bp region of the cytochrome  
140 oxidase subunit I (COI) mitochondrial gene was the target for amplification by polymerase  
141 chain reaction (PCR) using previously reported primers (35). Presence of the PCR product was

142 checked on a 2% agarose gel by gel electrophoresis. DNA was purified with the Wizard® SV  
143 Gel and PCR Clean system (Promega). The DNA concentration of amplicon was measured by  
144 NanoDrop (ThermoFisher), after which samples were sent for Sanger sequencing to Macrogen  
145 Europe.

#### 146 **Mosquito sequence analysis and phylogeny**

147 Sequences were edited and assembled with Bioedit version 7.2.5 (36) to obtain a single  
148 consensus sequence per individual mosquito. Through the BLAST tool, the generated COI  
149 sequences were compared to the NCBI database. Reference COI sequences for all mosquito  
150 species considered were selected according to Versteirt and colleagues (37), which employed  
151 reference sequences that were registered in the Barcode of Life Data (BOLD) Systems, and  
152 downloaded from GenBank. For phylogenetic analysis, the COI sequences generated in the  
153 study and the reference sequences were aligned with MAFFT v7.471 (38) using the G-INS-I  
154 option. The resulting alignment was trimmed by trimAl v1.4.rev15 (39) on gappyout setting  
155 and phylogenetic informative regions of the alignment were selected with BMGE v1.12 (40)  
156 for phylogenetic inference. Maximum-likelihood (ML) trees were constructed using IQ-TREE  
157 v2.0.3 (41) with automatic selection of the best nucleotide substitution model and 1000 ultrafast  
158 bootstrap replicates. Finally, trees were visualized using FigTree v1.4.4.

#### 159 **Haplotype network**

160 Haplotype inference and nucleotide diversity were calculated in ARLEQUIN, version 3.5.2.2  
161 (42). The population genetic data was analyzed using the median-joining (MJ) network  
162 algorithm in PopART, version 1.7 (43, 44). The COI sequences for *Cx. modestus* included in  
163 the haplotype network were retrieved from the NCBI database. These sequences were selected  
164 based on the specimen's country of origin and the length of the COI fragment (35).

165 **Pool design, sample preparation and sequencing for virome analysis**

166 The samples of mosquito abdomens were grouped in pools for sequencing according to the  
167 morphological identification of mosquito species by key points and sample location (urban,  
168 peri-urban and wetlands). Abdomens were homogenized in 600  $\mu$ L of PBS with 2.8 mm  
169 ceramic beads with the MINILYS tissue homogenizer, including a negative control (blank tube  
170 with PBS).

171 All pool samples followed the Novel enrichment technique of VIROMes (NetoVIR) sample  
172 preparation protocol optimized for viral metagenomics (45, 46). In brief, after homogenization,  
173 samples went through a centrifugation and filtration step to remove pro- and eukaryotic  
174 organisms and large organic debris. Next, a nuclease treatment (employing benzonase and  
175 micrococcal nuclease) was applied to remove free floating nucleic acids. Nucleic acids were  
176 extracted with the QIAamp Viral RNA mini kit (QIAGEN) to be further randomly amplified  
177 using a modified Whole Transcriptome Amplification 2 (WTA2) kit procedure (Sigma-  
178 Aldrich). The products were purified, and libraries were prepared using the NexteraXT Library  
179 Preparation kit (Illumina). Sequencing of the samples was carried out on a NextSeq 500 High  
180 Throughput platform (Illumina) for 300 cycles.

181 **Bioinformatic analysis and identification of eukaryotic viruses**

182 Quality and adapter trimming on raw paired-end reads was performed using Trimmomatic  
183 v0.39 (47). Next, contamination of samples was removed with Bowtie2 v2.3.4 (48) by mapping  
184 trimmed reads to a set of contigs present in the negative controls (reagent contamination).  
185 Remaining reads were *de novo* assembled into contigs using metaSPAdes v3.13.0 (49). To  
186 remove redundancy in the data, contigs were filtered on a length of 1000bp and subsequently  
187 clustered at 95% nucleotide identity over 80% of the length using Cluster-Genomes  
188 (<https://bitbucket.org/MAVERICLab/docker-clustergenomes>). All contigs were classified by  
189 DIAMOND (50) against NCBI's nr database (downloaded on 27 October 2020) on sensitive



190 mode for taxonomic annotation. KronaTools (51) was used to parse the DIAMOND output file  
191 and find the least common ancestor for each contig (based on the best 25 DIAMOND hits).  
192 Contigs annotated as eukaryotic virus were retrieved using an in-house Python script. Pool  
193 magnitudes were obtained by mapping the trimmed and decontaminated reads to these  
194 eukaryotic viral contigs with BWA-MEM2 (52, 53). The resulting abundance table was further  
195 used for ecological analysis in R using the phyloseq (54), metagenomeSeq (55), vegan (56) and  
196 ComplexHeatmap (57) packages.

### 197 **Recovery and phylogenetic analysis of (near-) complete meta-assembled genomes**

198 To recover full eukaryotic viral genomes in the mosquito pools, viral species were selected  
199 based on the level of genome completion after metagenomic *de novo* assembly. If a viral  
200 genome was not yet fully complete after assembly, the reads from the mosquito pool were  
201 mapped to a selected reference sequence (based on the annotated species by DIAMOND and  
202 Krona tools) with BWA-MEM2 (52, 53). The consensus sequence was subsequently retrieved  
203 with samtools and bcftools (58). For phylogenetic analysis, relevant reference complete genome  
204 sequences were chosen after BLASTn of the metagenomic assembled genomes (MAGs) and  
205 subsequently downloaded from GenBank. Alignment, trim, model selection, construction and  
206 visualization of phylogenetic trees was done as previously described for mosquito COI  
207 sequences.

## 208 **Results**

### 209 **Mosquito species detected in Leuven, Belgium**

210 A total of 107 mosquito specimens was collected in three distinct locations in Leuven in the  
211 summer of 2019. According to the DNA barcodes generated and morphological features, these  
212 mosquitoes belonged to eight mosquito species: *Cx. pipiens* (24.3%), *Cx. modestus* (48.6%),  
213 *Cx. torrentium* (0.9%), *Culiseta annulata* (0.9%), *Culiseta morsitans* (0.9%), *Ae. sticticus*  
214 (14.0%), *Ae. cinereus* (9.3%) and *Anopheles plumbeus* (0.9%) (Figure 1A). Surprisingly, *Cx.*

215 *modestus* accounted for ~50% of all collected mosquitoes in three different breeding sites. *Cx.*  
216 species were predominant in urban and peri-urban areas, whereas specimens found in the water  
217 reservoir wetlands belonged mostly to the genus *Aedes* (Figure 1B).

### 218 **Establishment of *Cx. modestus* in Leuven, Belgium**

219 A ML tree was built from the *Cx. modestus* COI barcodes obtained in Leuven and COI  
220 sequences of 20 other Culicid species described in (6). *Cx. modestus* barcodes from Leuven  
221 clustered with two reference *Cx. modestus* sequences that were included (KJ401305,  
222 MK971991). All sequences for *Cx. modestus* fell within one large well-supported monophyletic  
223 cluster, separated from other mosquito species, which suggests that they belong to the same  
224 species (Figure 2). To find out whether *Cx. modestus* is established in the region, field  
225 collections were performed in the summer of the consecutive year (2020) using the same  
226 geographic locations as previously. Again, *Cx. modestus* mosquitoes were retrieved (Figure 2),  
227 confirming the establishment of this mosquito species in the area of Leuven.

### 228 **Haplotype network of *Cx. modestus* mosquitoes**

229 The dataset analyzed for haplotype inference was constructed employing 184 *Cx. modestus*  
230 partial COI sequences retrieved from NCBI corresponding to eight European countries, and  
231 including 40 partial high-quality COI sequences obtained from the molecular identification of  
232 field collected mosquitoes in Leuven (Supplementary Table S2, S3, S4). 4 partial COI  
233 sequences from mosquitoes collected during the summer of 2020 were included as well.

234 Among the 228 COI sequences (639 bp), 97 haplotypes were found. The majority of haplotypes  
235 (88) were present only in the country of origin, while only 9 haplotypes were shared by two or  
236 more countries. Haplotype diversity ranged from 0.8182 in Spain to 1.000 in Denmark,  
237 Portugal, Serbia and Sweden (Table 1). This analysis revealed that haplotype diversity in  
238 Belgium was the second highest (0.9852) of all countries screened, followed by the U.K.  
239 (0.9252) and Germany (0.9013). Nucleotide diversity estimations ranged from 0.0058 in Spain

240 to 0.0270 in Belgium. Belgium exhibited a nucleotide diversity of 0.0270, which can be  
241 considered moderate, but which is the highest in all included European countries.

#### 242 **Mitochondrial DNA genealogy of *Cx. modestus***

243 The median-joining network displayed the ancestry of *Cx. modestus* mosquitoes (Figure 3),  
244 where two lineages were visualized separated by 1 mutation step. Haplotypes from Spain and  
245 Portugal were found uniquely in lineage I, while haplotypes from Germany, the UK, Belgium  
246 and Sweden predominated in lineage II. Haplotypes from France, Serbia and Denmark were  
247 scattered across both lineages. The majority of haplotypes that were found in Belgium were  
248 located in between of three central haplotypes of lineage II, which contain samples from several  
249 countries: one is shared by Belgium, the UK and Serbia (Figure 2, “3”), another one is shared  
250 by Belgium, the UK and Sweden (Figure 2, “2”), and the biggest one is shared by Belgium,  
251 Germany, the UK, France and Sweden (Figure 2, “1”). Haplotypes found in mosquitoes  
252 collected in Leuven during the summer of 2020 were observed in both lineage I (1 haplotype)  
253 and lineage II (3 haplotypes).

#### 254 **A peek into the virome of Belgian mosquitoes**

255 We characterized the virome of 107 mosquitoes’ abdomens, divided into eight pools according  
256 to their morphological identification and representing the three different habitat types  
257 mentioned before. A total of 44,002,358 reads were obtained from all mosquito pools. Most  
258 reads (21,602,296; 49.1%) belonged to the urban group. Mosquitoes collected in peri-urban and  
259 wetland areas generated 13,891,285 (31.6%) and 8,508,777 (19.3%) reads, respectively.

260 In all pools, the proportion of reads mapping to the order Diptera ranged from 40.8 to 77.7%.  
261 Regarding the bacterial reads, the wetland samples had a higher mean proportion (3.83%),  
262 followed by the urban samples with 2.03%, while the peri-urban samples presented less than  
263 1% of reads mapping to bacteria. The viral component was more variable, with an observable  
264 ascending trend when moving from the wetlands to peri-urban and urban areas. Wetland

265 samples gathered a low proportion of viral reads (<2%), whereas viral reads in peri-urban areas  
266 accounted for 1.28 – 7.19%. Lastly, reads mapping to the viral component composed 7.45 –  
267 44.69% in the urban samples.

268 After filtering the viral reads for eukaryotic viral species, the relative abundances in the  
269 mosquito pools are shown in Figure 4 per viral family. While the *Cx.* pools in the urban area  
270 were completely dominated by one viral family (*Mesoniviridae* and *Iflaviridae* for pool 1 and  
271 pool 2 respectively), the mosquito pools from the peri-urban and wetland habitats seemed to  
272 have a higher viral diversity. The peri-urban samples contained mostly viral reads from a  
273 Negev-related virus, namely Yongsan negev-like virus 1, and from the *Totiviridae* family, with  
274 *Culex inatomii totivirus* being the most abundant viral species. In the wetlands *Ae. cinereus*  
275 pool on the other hand, an unclassified Bunya-like virus was most abundant.

#### 276 **Comparing the eukaryotic virome across habitat type and mosquito genus**

277 To compare the eukaryotic virome of our samples, we mapped all trimmed and decontaminated  
278 reads back to the selected viral contigs, extracted the abundance table and subsequently  
279 constructed a heatmap with the normalized counts for each viral species on a log<sub>2</sub> scale (Figure  
280 5). In total, 33 eukaryotic viral species could be detected across all samples (a viral species was  
281 considered present if it had at least one contig >1000 bp and if more than 500 reads map to it).  
282 According to the Bray-Curtis distance matrix, the eukaryotic viromes of the *Cx.* mosquito pools  
283 clearly clustered together per habitat type. However, except for the peri-urban *Cx.* pools, each  
284 remaining pool had a more unique viral composition and only a small number of viruses were  
285 significantly shared between samples. Nevertheless, the peri-urban mosquito pools had a  
286 majority of viruses in common, such as *Culex inatomii totivirus* and Yongsan negev-like virus  
287 1 which were shared with high abundance, while Ista virus, Sonnbo virus and Fitzroy Crossing  
288 toti-like virus 2 were common in lower abundance.

#### 289 **Recovery of (near-) complete meta-assembled genomes**

290 In total we managed to recover 9 (near-) complete genomes of 6 viral species in our  
291 metagenomic data. These viral species belong to the following families: *Totiviridae* (*Culex*  
292 *inatomii* totivirus in pool 4, 5 and 6), *Iflaviridae* (Yongsan iflavirus 1 and *Culex* iflavi-like virus  
293 4 in pool 2), *Mesoniviridae* (Alphamesonivirus 1 in pool 1), *Rhabdoviridae* (Riverside virus 1  
294 in pool 8) and unclassified Negev-related viruses (Yongsan negev-like virus 1 in pool 5 and 6),  
295 and their phylogenetic relatedness to closely related reference strains is shown in Figure 6  
296 (Supplementary Table S5).

### 297 **dsRNA viruses**

#### 298 *Totiviridae*

299 This family of dsRNA viruses are known to infect fungi, plants and invertebrates. In this study,  
300 we found *Culex* totivirus Leu1, Leu2 and Leu3 (98.3% average BLASTx identity with *Culex*  
301 *inatomii* totivirus; LC514398.1) in all peri-urban mosquito pools. This novel totivirus was  
302 recently described in *Cx. inatomii* mosquitoes in Japan (59), and our finding now confirms its  
303 association with mosquitoes as a host.

### 304 **(+) ssRNA viruses**

#### 305 *Mesoniviridae*

306 When constructing a phylogenetic tree of the MAG annotated as Alphamesonivirus 1 (99.7  
307 BLASTx % identity; MH520101.1), together with all reference sequences of the *Mesoniviridae*  
308 family, our complete Alphamesonivirus Leu4 genome formed a clade with Nam Dinh virus and  
309 Cavally virus. Both Alphamesoni 1 viruses are frequently linked to mosquitoes (60, 61).  
310 Interestingly, all known members of the *Mesoniviridae* family infect mosquito hosts.

#### 311 *Iflaviridae*

312 Iflaviruses are a well-known group of picorna-like viruses that exclusively infect arthropods  
313 (62). We found two complete genomes of iflaviruses (Iflavirus Leu5 and Iflavirus Leu6, having  
314 a 98.3 and 97.1 BLASTx % identity with *Culex* iflavi-like virus 4 (MT096522.1) and Yongsan

315 iflavirus 1 (NC\_040587.1) respectively) in an urban mosquito pool consisting entirely of *Cx.*  
316 *pipiens* mosquitoes.

317         Negev-related

318 Negevirus is a proposed taxon for diverse and geographically widely distributed insect-specific  
319 viruses isolated from mosquitoes and phlebotomine sandflies (63). We recovered 2 full  
320 genomes annotated as Yongsan negev-like virus 1 (average of 95.1 BLASTx % identity;  
321 MH703054.1) from two peri-urban mosquito pools that mainly contained *Cx. modestus*  
322 mosquitoes, named Negevirus Leu7 and Leu8.

323 **(-) ssRNA viruses**

324         *Rhabdoviridae*

325 Rhabdoviruses are a diverse group of negative-sense ssRNA viruses known to infect both  
326 vertebrates and invertebrates as well as plants (64). Riversidevirus 1 was first described in  
327 *Ochlerotatus sp.* mosquitoes in Central Europe (65) and, in this study, it was also detected  
328 (98.2% BLASTx identity; KU248086.1). Rhabdovirus Leu9 was identified in a pool containing  
329 mostly *Ochlerotatus* mosquitoes. This suggests a restricted host species range as, up to this date  
330 and to our knowledge, this virus has not been found in other mosquito species or other hosts  
331 yet.

332 **Discussion**

333 A national mosquito inventory between 2007 and 2010 (MODIRISK project) clarified that the  
334 mosquito fauna in Belgium is composed by twenty-three mosquito species belonging to five  
335 traditionally recognized genera, including twenty-one indigenous and two exotic species (*Ae.*  
336 *koreicus* and *Ae. japonicus*)(66). The five most abundant species were *Cx.*  
337 *pipiens* (61.62%), *Coquillettidia richiardii* (15.43%), *Ae. cinereus* (5.04%), *Anopheles claviger*  
338 (3.52%) and *Ae. vexans* (2.93%) (66). Amid the eight species that were collected in this study  
339 in Leuven, *Cx. pipiens*, *Cx. torrentium*, *Culiseta annulata*, *Culiseta morsitans*, *Ae. sticticus*, *Ae.*

340 *cinereus* and *Anopheles plumbeus* have been reported as autochthonous species of Belgium  
341 according to the latest mosquito species checklist(6).

342 In contrast, *Cx. modestus* findings in Belgium are rare. Only one larva has been encountered  
343 before during the latest exotic mosquito survey carried out from 2017 – 2019 (7, 67) However,  
344 during our survey in 2019, *Cx. modestus* accounted for almost half of the mosquitoes that were  
345 collected, in three different breeding sites. In addition, *Cx. modestus* mosquitoes were  
346 reconfirmed at the same collection sites in the summer of 2020. This finding suggests the  
347 establishment of this mosquito species in Belgium, potentially introduced from the UK or  
348 Germany. The appearance and spread of *Cx. modestus* in the UK has only been reported recently  
349 as well, although this species seems to be abundantly present in certain regions based on recent  
350 surveys (2017, 2019) (3). The hypothesis for not noticing its presence in UK before probably  
351 relies on the misidentification of *Cx. modestus* by other mosquito species, such as *Cx.*  
352 *torrentium* (3).

353 Along with the introduction of a new mosquito species in a region, its potential role in the  
354 transmission of arboviruses that could cause disease in animals and humans must be evaluated.  
355 The presence of *Cx. modestus* in Belgium could be problematic as it is one of most important  
356 vectors for *Dirofilaria spp.* such as *Dirofilaria immitis* (68). Furthermore, coexistence of *Cx.*  
357 *pipiens* and *Cx. Modestus*, two important vectors, may increase the risk of transmission for  
358 WNV and USUV, given the right circumstances. These two viruses are likely to co-circulate in  
359 the same habitat, where birds and *Cx. modestus* mosquitoes play their roles as hosts and vectors,  
360 respectively (21). In September 2020, enzootic transmission of WNV in the Netherlands, a  
361 neighbouring country of Belgium, was confirmed for the first time by detecting simultaneously  
362 the presence of the virus in a local common whitethroat, in field collected mosquito pools and  
363 in humans (69). Given the establishment of *Cx. modestus* in Belgium, it would be advisable to  
364 implement vector surveillance for this species. In Europe, the higher biting activity displayed



365 by *Cx. modestus* lasts from July until the beginning of the October. However, given the  
366 detection of Tahyna virus (an arbovirus) in hibernating *Cx. modestus* mosquitoes in France (14),  
367 winter collection can also be considered for the surveillance of mosquito-transmitted pathogens.

368 In order to examine the genetic structure of the *Cx. modestus* population found in Leuven, we  
369 gathered mitochondrial sequences of *Cx. modestus* mosquitoes collected in other countries  
370 across Europe and constructed a haplotype network using the MJ method based on 228 partial  
371 COI sequences. As recently reported (3), *Cx. modestus* populations across Europe are separated  
372 in two lineages. According to this network most Belgian haplotypes were connected to  
373 haplotypes from the UK and Germany, suggesting that the mosquito population in Leuven,  
374 Belgium could be derived from these two populations. There were three central haplotypes in  
375 the lineage II that were shared by several countries. In lineage I, there is one central haplotype  
376 that was shared by individuals from Denmark, Spain, and Belgium. This data might indicate  
377 that *Cx. modestus* mosquitoes belonging to both lineages are present in Belgium, suggesting the  
378 occurrence of at least two independent introduction events.

379 Vector competence of the mosquito can be influenced by several factors. Bacterial symbionts  
380 such as *Wolbachia* have the ability to hinder infection of a variety of pathogens such as  
381 chikungunya virus, dengue virus, Zika virus, WNV and malaria-causing *Plasmodium* in  
382 different mosquito species (70). It is possible that viral symbionts discovered in mosquitoes  
383 may have a similar effect. For instance, the insect-specific virus Nhumirim virus was shown to  
384 inhibit the replication of WNV, St Louis encephalitis virus and Japanese encephalitis virus in  
385 C6/36 cells (71). As a first step into unveil the role of viral symbionts in the mosquito's vector  
386 competence, we investigated the virome of the collected mosquitoes. Of note, no USUV or  
387 WNV was detected in the collected *Cx.* mosquitoes. Furthermore, no Lednice virus was  
388 detected in the *Cx. modestus* samples, although this mosquito species was reported to be an  
389 important Lednice *Orthobunyavirus* vector (13). In total, 33 eukaryotic viral species could be



390 detected across all our samples in this study, and we recovered 9 (near-)complete genomes of  
391 6 viral species.

392 When comparing viral hits across the mosquito species and habitat types where they were  
393 collected, some similarities could be observed. Mosquito pools belonging to the same genus  
394 seemed to have more viruses in common, as shown by the clustering of the *Cx.* mosquito pools  
395 or the distinct virome profile presented by the pool composed of *Anopheles/Culiseta* (pool 3)  
396 compared to the other pools. Additionally, we observed a clustering of pools per habitat type.  
397 In this case, peri-urban mosquito pools harbored several viruses in common, and in great  
398 abundance, such as *Culex* totivirus Leu1, Leu2 and Leu3, and Negevirus Leu7 and Leu8,  
399 closely related to *Culex inatomii* totivirus and Yongsan negev-like virus 1, respectively. Also,  
400 the 6 viral species of which the (near-) complete genome was recovered were previously  
401 reported as, or clustered together with, viruses associated to mosquitoes, which might hint at  
402 the preservation of a core mosquito virome. However, a larger sampling size is needed to  
403 suggest that the virome composition and its abundance differ according to genus, local  
404 acquisition and ecosystem, and habitat composition.

405 When comparing our results with a virome study on *Cx. quinquefasciatus* and *Ae. aegypti*  
406 mosquitoes collected from Guadeloupe, which is the largest island of the French West Indies  
407 in the Caribbean, there were two virus species (Hubei toti-like virus 10 and Hubei partiti-like  
408 virus 22) found to be shared with Belgian mosquitoes (72). The fact that the same virus species  
409 was found in mosquitoes collected in Belgium and in Guadeloupe could indicate a widespread  
410 global movement and/or long host–virus coevolution. Moreover, several viruses were shared  
411 with Northern European Swedish mosquitoes (Whidbey virus, Hubei partiti-like virus 22, Chaq  
412 virus-like 1, Ista virus, Wuhan Mosquito Virus 6, and Sonnbo virus) (31, 73). At the virus  
413 family/order level, the relative virome abundance of the Swedish *Cx. pipiens* was dominated by

414 the Luteo-, Orthomyxo- and Nam Dinh virus. In contrast, the virome of Belgian *Cx. pipiens*  
415 was dominated by *Iflaviridae* (pool 2).

416 When mosquito samples are pooled, as we did in our study, the virome profile could be strongly  
417 skewed by one or a few high titer virus infection(s) from a single mosquito in the pool. In a  
418 study of Swedish mosquitoes, Pettersson et al. (2019) reported that 30% of all reads of one of  
419 the libraries composed of *Cx. torrentium* mosquitoes were annotated to Nam Dinh virus. From  
420 pool 1, we recovered the (near-) complete genome of Alphamesonivirus Leu4, which is a  
421 member of the *Mesoniviridae* family that contains the Nam Dinh virus. Considering what was  
422 reported in Swedish mosquitoes and that pool 1 was the only pool containing one individual of  
423 *Cx. torrentium*, we suggest that Alphamesonivirus Leu4 might have been harbored by this  
424 mosquito species, as it was not found in any other mosquito pool. In our study, the occurrence  
425 of more than one mosquito genera in the same pool was unintentional and resulted from the  
426 pooling based on morphological identification. For further research, the use of the individual  
427 mosquito body is recommended to perform virome characterization. The feasibility of this  
428 approach on single mosquitoes has been evaluated and no significant differences in total reads  
429 number and viral reads proportion were found when compared to pooled mosquitoes samples  
430 (72).

431 In conclusion, we here report the establishment of *Cx. modestus* in the surroundings of the city  
432 of Leuven, Belgium. The virome of the collected mosquitoes was revealed by a metagenomics  
433 approach. As *Cx. modestus* is known to be a vector of WNV, USUV and other arboviruses,  
434 surveillance for this mosquito species is recommended.

435

#### 436 **Acknowledgements**

437 This project was funded by KU Leuven (C22/18/007 and starting grant STG/19/008). We would  
438 like to thank Prof. dr. ir. Raf Aerts and his team at the Division Ecology, Evolution and

439 Biodiversity Conservation, University of Leuven (KU Leuven), for their advice on the selection  
440 of mosquito collection sites representing different habitat types. Additionally, we would like to  
441 thank Prof. Johan Neyts (KU Leuven) for allowing us the use of his laboratory space and  
442 equipment for our experimental work. Equally, we would like to thank Katrien De Wolf from  
443 the Unit Entomology, Institute of Tropical Medicine in Belgium for reviewing the manuscript  
444 and helpful suggestions.

## 445 **References**

- 446 1. Ficalbi E. 1889. Zanzara di colorito modesto. Boll della Soc Entomol Ital 1:93–94.
- 447 2. European Centre for Disease Prevention and Control and European Food Safety  
448 Authority. 2020. *Culex modestus* - current known distribution: May 2020.
- 449 3. Hernández-Triana LM, Brugman VA, Pramual P, Barrero E, Nikolova NI, Ruiz-  
450 Arrondo I, Kaiser A, Krüger A, Lumley S, Osório HC, Ignjatović-Ćupina A, Petrić D,  
451 Laure Setier-Rio M, Bødker R, Johnson N. 2020. Genetic diversity and population  
452 structure of *Culex modestus* across Europe: does recent appearance in the United  
453 Kingdom reveal a tendency for geographical spread? *Med Vet Entomol* 34:86–96.
- 454 4. Bødker R, Klitgård K, Byriel DB, Kristensen B. 2014. Establishment of the West Nile  
455 virus vector, *Culex modestus*, in a residential area in Denmark. *J Vector Ecol* 39:1–3.
- 456 5. Lindström A, Lilja T. 2018. First finding of the West Nile virus vector *Culex modestus*  
457 Ficalbi 1889 (Diptera; Culicidae) in Sweden. *J Eur Mosq Control Assoc* 36.
- 458 6. Boukraa S, Dekoninck W, Versteirt V, Schaffner F, Coosemans M, Haubruge E,  
459 Francis F. 2015. Updated checklist of the mosquitoes (Diptera: Culicidae) of Belgium.  
460 *J Vector Ecol* 40:398–407.
- 461 7. De wolf K, Vanderheyden A, Deblauwe I, Smits N, Gombeer S, Vanslebrouck a,  
462 Meganck K, Dekoninck W, De meyer M, Backeljau T, Müller R, Van bortel W. 2021.  
463 First record of the West Nile virus bridge vector *Culex modestus* Ficalbi (Diptera:  
464 Culicidae) in Belgium, validated by DNA barcoding. *Zootaxa* 4920:131–139.
- 465 8. Brugman VA, Hernández-Triana LM, England ME, Medlock JM, Mertens PPC, Logan  
466 JG, Wilson AJ, Fooks AR, Johnson N, Carpenter S. 2017. Blood-feeding patterns of  
467 native mosquitoes and insights into their potential role as pathogen vectors in the  
468 Thames estuary region of the United Kingdom. *Parasites and Vectors* 10:1–12.
- 469 9. Brugman VA, England ME, Stoner J, Tugwell L, Harrup LE, Wilson AJ, Medlock JM,

- 470 Logan JG, Fooks AR, Mertens PPC, Johnson N, Carpenter S. 2017. How often do  
471 mosquitoes bite humans in southern England? A standardised summer trial at four sites  
472 reveals spatial, temporal and site-related variation in biting rates. *Parasites and Vectors*  
473 10.
- 474 10. Tran A, L'Ambert G, Balança G, Pradier S, Grosbois V, Balenghien T, Baldet T,  
475 Lecollinet S, Leblond A, Gaidet-Drapier N. 2017. An Integrative Eco-Epidemiological  
476 Analysis of West Nile Virus Transmission. *Ecohealth* 14:474–489.
- 477 11. Ionică AM, Zित्रा C, Wimmer V, Leitner N, Votýpka J, Modrý D, Mihalca AD,  
478 Fuehrer HP. 2017. Mosquitoes in the Danube Delta: Searching for vectors of filarioid  
479 helminths and avian malaria. *Parasites and Vectors* 10.
- 480 12. Svobodová M, Volf P, Votýpka J. 2015. Trypanosomatids in ornithophilic  
481 bloodsucking Diptera. *Med Vet Entomol* 29:444–447.
- 482 13. Berčič RL, Bányai K, Růžek D, Fehér E, Domán M, Danielová V, Bakonyi T,  
483 Nowotny N. 2019. Phylogenetic analysis of lednice Orthobunyavirus. *Microorganisms*  
484 7.
- 485 14. Chippaux A, Rageau J, Mouchet J. 1970. [Hibernation of arbovirus Tahyna in *Culex*  
486 *modestus* Fic. in France]. *C R Acad Sci Hebd Seances Acad Sci D1970/03/23.*  
487 270:1648–1650.
- 488 15. Vaux AGC, Gibson G, Hernandez-Triana LM, Cheke RA, McCracken F, Jeffries CL,  
489 Horton DL, Springate S, Johnson N, Fooks AR, Leach S, Medlock JM. 2015.  
490 Enhanced West Nile virus surveillance in the North Kent marshes, UK. *Parasites and*  
491 *Vectors* 8:91.
- 492 16. Monaco F, Goffredo M, Briguglio P, Pinoni C, Polci A, Iannetti S, Pinto S,  
493 Marruchella G, Di Francesco G, Di Gennaro A, Pais M, Teodori L, Bruno R, Catalani  
494 M, Ruiu A, Lelli R, Savini G. 2015. Descrizione dei focolai di west nile disease nel

- 495 2011 nella regione Sardegna, Italia. *Vet Ital* 51:5–16.
- 496 17. Rudolf I, Blažejová H, Šebesta O, Mendel J, Peško J, Betášová L, Straková P, Šikutová  
497 S, Hubálek Z. 2018. West Nile virus (lineage 2) in mosquitoes in southern Moravia -  
498 awaiting the first autochthonous human cases. *Epidemiol Mikrobiol Imunol* 67:44–6.
- 499 18. Rudolf I, Rettich F, Betášová L, Imrichová K, Mendel J, Hubálek Z, Šikutová S. 2019.  
500 West Nile virus (lineage 2) detected for the first time in mosquitoes in Southern  
501 Bohemia: new WNV endemic area? *Epidemiol Mikrobiol Imunol* 68:150–153.
- 502 19. Balenghien T, Vazeille M, Reiter P, Schaffner F, Zeller H, Bicout D. 2007. Evidence of  
503 Laboratory Vector Competence of *Culex Modestus* for West Nile Virus. *J Am Mosq*  
504 *Control Assoc* 23.
- 505 20. Balenghien T, Vazeille M, Grandadam M, Schaffner F, Zeller H, Reiter P, Sabatier P,  
506 Fouque F, Bicout DJ. 2008. Vector competence of some French *Culex* and *Aedes*  
507 mosquitoes for West Nile Virus. *Vector-Borne Zoonotic Dis* 8:589–595.
- 508 21. Rudolf I, Bakonyi T, Šebesta O, Mendel J, Peško J, Betášová L, Blažejová H,  
509 Venclíková K, Straková P, Nowotny N, Hubálek Z. 2015. Co-circulation of Usutu virus  
510 and West Nile virus in a reed bed ecosystem. *Parasites and Vectors* 8.
- 511 22. Gaibani P, Rossini G. 2017. An overview of Usutu virus. *Microbes Infect* 19:382–387.
- 512 23. Weissenböck H, Bakonyi T, Rossi G, Mani P, Nowotny N. 2013. Usutu virus, Italy,  
513 1996. *Emerg Infect Dis* 19:274–277.
- 514 24. Weissenböck H, Kolodziejek J, Url A, Lussy H, Rebel-Bauder B, Nowotny N. 2002.  
515 Emergence of *Usutu virus*, an African Mosquito-Borne *Flavivirus* of the Japanese  
516 Encephalitis Virus Group, Central Europe. *Emerg Infect Dis* 8:652–656.
- 517 25. Becker N, Jöst H, Ziegler U, Eiden M, Höper D, Emmerich P, Fichet-Calvet E,  
518 Ehichioya DU, Czajka C, Gabriel M, Hoffmann B, Beer M, Tenner-Racz K, Racz P,  
519 Günther S, Wink M, Bosch S, Konrad A, Pfeffer M, Groschup MH, Schmidt-Chanasit

- 520 J. 2012. Epizootic emergence of Usutu virus in wild and captive birds in Germany.  
521 PLoS One 7.
- 522 26. Oude Munnink BB, Münger E, Nieuwenhuijse DF, Kohl R, van der Linden A,  
523 Schapendonk CME, van der Jeugd H, Kik M, Rijks JM, Reusken CBEM, Koopmans  
524 M. 2020. Genomic monitoring to understand the emergence and spread of Usutu virus  
525 in the Netherlands, 2016-2018. *Sci Rep* 10:2798.
- 526 27. Rouffaer LO, Steensels M, Verlinden M, Vervaeke M, Boonyarittichai R, Martel A,  
527 Lambrecht B. 2018. Usutu Virus Epizootic and *Plasmodium* Coinfection in Eurasian  
528 Blackbirds (*Turdus merula*) in Flanders, Belgium. *J Wildl Dis* 54:859–862.
- 529 28. Benzarti E, Sarlet M, Franssen M, Cadar D, Schmidt-Chanasit J, Rivas JF, Linden A,  
530 Desmecht D, Garigliany M. 2020. Usutu Virus Epizootic in Belgium in 2017 and 2018:  
531 Evidence of Virus Endemization and Ongoing Introduction Events. *Vector-Borne*  
532 *Zoonotic Dis* 20:43–50.
- 533 29. Shi C, Liu Y, Hu X, Xiong J, Zhang B, Yuan Z. 2015. A metagenomic survey of viral  
534 abundance and diversity in mosquitoes from hubei province. *PLoS One*. Public Library  
535 of Science.
- 536 30. Bolling BG, Weaver SC, Tesh RB, Vasilakis N. 2015. Insect-specific virus discovery:  
537 Significance for the arbovirus community. *Viruses*. MDPI AG.
- 538 31. Öhlund P, Hayer J, Lundén H, Hesson JC, Blomström A-L. 2019. Viromics Reveal a  
539 Number of Novel RNA Viruses in Swedish Mosquitoes. *Viruses* 11:1027.
- 540 32. Mayi MPA, Bamou R, Djiappi-Tchamen B, Fontaine A, Jeffries CL, Walker T,  
541 Antonio-Nkondjio C, Cornel AJ, Tchuinkam T. 2020. Habitat and Seasonality Affect  
542 Mosquito Community Composition in the West Region of Cameroon. *Insects* 11:312.
- 543 33. Becker N, Petric D, Zgomba M, Boase C, Madon M, Dahl C, Kaiser A, Becker N,  
544 Petrić D, Zgomba M, Boase C, Madon M, Dahl C, Kaiser A. 2010. Key to Female

- 545 Mosquitoes, p. 91–111. *In* Mosquitoes and Their Control. Springer Berlin Heidelberg.
- 546 34. Ander M, Troell K, Chirico J. 2013. Barcoding of biting midges in the genus  
547 Culicoides: A tool for species determination. *Med Vet Entomol* 27:323–331.
- 548 35. Folmer O, Black M, Hoeh W, Lutz R, Vrijenhoek R. 1994. DNA primers for  
549 amplification of mitochondrial cytochrome c oxidase subunit I from diverse metazoan  
550 invertebrates. *Mol Mar Biol Biotechnol* 3:294–299.
- 551 36. Hall TA. 1999. BioEdit : a user-friendly biological sequence alignment editor and  
552 analysis program for Windows 95/98/NT. *Nucleic Acids Symp Ser* 41:95–98.
- 553 37. Versteirt V, Nagy ZT, Roelants P, Denis L, Breman FC, Damiens D, Dekoninck W,  
554 Backeljau T, Coosemans M, Van Bortel W. 2015. Identification of Belgian mosquito  
555 species (Diptera: Culicidae) by DNA barcoding. *Mol Ecol Resour* 15:449–457.
- 556 38. Katoh K, Standley DM. 2013. MAFFT multiple sequence alignment software version  
557 7: Improvements in performance and usability. *Mol Biol Evol* 30:772–780.
- 558 39. Capella-Gutiérrez S, Silla-Martínez JM, Gabaldón T. 2009. trimAl: A tool for  
559 automated alignment trimming in large-scale phylogenetic analyses. *Bioinformatics*  
560 25:1972–1973.
- 561 40. Criscuolo A, Gribaldo S. 2010. BMGE (Block Mapping and Gathering with Entropy):  
562 A new software for selection of phylogenetic informative regions from multiple  
563 sequence alignments. *BMC Evol Biol* 10:210.
- 564 41. Nguyen LT, Schmidt HA, Von Haeseler A, Minh BQ. 2015. IQ-TREE: A fast and  
565 effective stochastic algorithm for estimating maximum-likelihood phylogenies. *Mol*  
566 *Biol Evol* 32:268–274.
- 567 42. Excoffier L, Lischer HEL. 2010. Arlequin suite ver 3.5: A new series of programs to  
568 perform population genetics analyses under Linux and Windows. *Mol Ecol Resour*  
569 10:564–567.



- 570 43. Bandelt HJ, Forster P, Röhl A. 1999. Median-joining networks for inferring  
571 intraspecific phylogenies. *Mol Biol Evol* 16:37–48.
- 572 44. Leigh JW, Bryant D. 2015. POPART: Full-feature software for haplotype network  
573 construction. *Methods Ecol Evol* 6:1110–1116.
- 574 45. Conceição-Neto N, Zeller M, Lefrère H, De Bruyn P, Beller L, Deboutte W, Yinda CK,  
575 Lavigne R, Maes P, Ranst M Van, Heylen E, Matthijnsens J. 2015. Modular approach  
576 to customise sample preparation procedures for viral metagenomics: A reproducible  
577 protocol for virome analysis. *Sci Rep* 5:1–14.
- 578 46. Shi C. 2020. Unbiased analyses of virome in mosquito vectors and their association  
579 with the transmission potential of pathogenetic arboviruses. KU Leuven.
- 580 47. Bolger AM, Lohse M, Usadel B. 2014. Trimmomatic: A flexible trimmer for Illumina  
581 sequence data. *Bioinformatics* 30:2114–2120.
- 582 48. Langmead B, Salzberg SL. 2012. Fast gapped-read alignment with Bowtie 2. *Nat*  
583 *Methods* 9:357–359.
- 584 49. Nurk S, Meleshko D, Korobeynikov A, Pevzner PA. 2017. MetaSPAdes: A new  
585 versatile metagenomic assembler. *Genome Res* 27:824–834.
- 586 50. Buchfink B, Xie C, Huson DH. 2015. Fast and sensitive protein alignment using  
587 DIAMOND. *Nat Methods*. Nature Publishing Group.
- 588 51. Ondov BD, Bergman NH, Phillippy AM. 2011. Interactive metagenomic visualization  
589 in a Web browser. *BMC Bioinformatics* 12:385.
- 590 52. Li H, Durbin R. 2009. Fast and accurate short read alignment with Burrows-Wheeler  
591 transform. *Bioinformatics* 25:1754–1760.
- 592 53. Md V, Misra S, Li H, Aluru S. 2019. Efficient Architecture-Aware Acceleration of  
593 BWA-MEM for Multicore Systems. *IEEE Parallel Distrib Process Symp* 314–324.
- 594 54. McMurdie PJ, Holmes S. 2013. phyloseq: An R Package for Reproducible Interactive

- 595 Analysis and Graphics of Microbiome Census Data. *PLoS One* 8:e61217.
- 596 55. Paulson JN, Colin Stine O, Bravo HC, Pop M. 2013. Differential abundance analysis  
597 for microbial marker-gene surveys. *Nat Methods* 10:1200–1202.
- 598 56. Dixon P. 2003. VEGAN, a package of R functions for community ecology. *J Veg Sci*.  
599 Opulus Press AB.
- 600 57. Gu Z, Eils R, Schlesner M. 2016. Complex heatmaps reveal patterns and correlations in  
601 multidimensional genomic data. *Bioinformatics* 32:2847–2849.
- 602 58. Li H, Handsaker B, Wysoker A, Fennell T, Ruan J, Homer N, Marth G, Abecasis G,  
603 Durbin R. 2009. The Sequence Alignment/Map format and SAMtools. *Bioinformatics*  
604 25:2078–2079.
- 605 59. Faizah AN, Kobayashi D, Isawa H, Amoa-Bosompem M, Murota K, Higa Y, Futami  
606 K, Shimada S, Kim KS, Itokawa K, Watanabe M, Tsuda Y, Minakawa N, Miura K,  
607 Hirayama K, Sawabe K. 2020. Deciphering the Virome of *Culex vishnui* Subgroup  
608 Mosquitoes, the Major Vectors of Japanese Encephalitis, in Japan. *Viruses* 12:264.
- 609 60. Zhou J, Jin Y, Chen Y, Li J, Zhang Q, Xie X, Gan L, Liu Q. 2017. Complete Genomic  
610 and Ultrastructural Analysis of a Nam Dinh Virus Isolated from *Culex pipiens*  
611 *quinquefasciatus* in China\*. *Sci Rep* 7:271.
- 612 61. Zirkel F, Kurth A, Quan PL, Briese T, Ellerbrok H, Pauli G, Leendertz FH, Lipkin WI,  
613 Ziebuhr J, Drosten C, Junglen S. 2011. An insect nidovirus emerging from a primary  
614 tropical rainforest. *MBio* 2.
- 615 62. van Oers M. 2008. Iflavirus, p. 42–6. *In* Mahy, B, Van Regenmortel, M (eds.),  
616 *Encyclopedia of Virology* Third. Oxford: Academic Press.
- 617 63. Vasilakis N, Forrester NL, Palacios G, Nasar F, Savji N, Rossi SL, Guzman H, Wood  
618 TG, Popov V, Gorchakov R, Gonzalez A V., Haddow AD, Watts DM, da Rosa APAT,  
619 Weaver SC, Lipkin WI, Tesh RB. 2013. Negevirus: a Proposed New Taxon of Insect-

- 620 Specific Viruses with Wide Geographic Distribution. *J Virol* 87:2475–2488.
- 621 64. Kuzmin I V., Novella IS, Dietzgen RG, Padhi A, Rupprecht CE. 2009. The  
622 rhabdoviruses: Biodiversity, phylogenetics, and evolution. *Infect Genet Evol* 9:541–  
623 553.
- 624 65. Reuter G, Boros Á, Pál J, Kapusinszky B, Delwart E, Pankovics P. 2016. Detection and  
625 genome analysis of a novel (dima)rhabdovirus (Riverside virus) from *Ochlerotatus* sp.  
626 mosquitoes in Central Europe. *Infect Genet Evol* 39:336–341.
- 627 66. Versteirt V, Boyer S, Damiens D, De Clercq EM, Dekoninck W, Ducheyne E,  
628 Grootaert P, Garros C, Hance T, Hendrickx G, Coosemans M, Van Bortel W. 2013.  
629 Nationwide inventory of mosquito biodiversity (Diptera: Culicidae) in Belgium,  
630 Europe. *Bull Entomol Res* 103:193–203.
- 631 67. Deblauwe I, De Wolf K, Smitz N, Vanslembrouck A, Schneider A, De Witte J, Verlé I,  
632 Dekoninck W, De Meyer M, Backeljau T, Gombeer S, Meganck K, Van Bourgonie Y-  
633 R, Vanderheyden A, Müller R, Van Bortel W. 2020. Monitoring of exotic mosquitoes  
634 in Belgium (MEMO): Final Report Phase 7 Part 1: MEMO results. Antwerp.
- 635 68. Rossi L, Pollono F, Meneguz PG, Cancrini G. 1999. Quattro specie di culicidi come  
636 possibili vettori di *Dirofilaria immitis* nella risaia piemontese. *Parassitologia* 41:537–  
637 542.
- 638 69. Vlaskamp DR, Thijsen SF, Reimerink J, Hilkens P, Bouvy WH, Bantjes SE,  
639 Vlaminckx BJ, Zaaijer H, van den Kerkhof HH, Raven SF, Reusken CB. 2020. First  
640 autochthonous human West Nile virus infections in the Netherlands, July to August  
641 2020. *Eurosurveillance* 25:2001904.
- 642 70. Caragata EP, Dutra HLC, Moreira LA. 2016. Inhibition of Zika virus by *Wolbachia* in  
643 *Aedes aegypti*. *Microb Cell*. Shared Science Publishers OG.
- 644 71. Kenney JL, Solberg OD, Langevin SA, Brault AC. 2014. Characterization of a novel

- 645 insect-specific flavivirus from Brazil: Potential for inhibition of infection of arthropod  
646 cells with medically important flaviviruses. *J Gen Virol* 95:2796–2808.
- 647 72. Shi C, Beller L, Deboutte W, Yinda KC, Delang L, Vega-Rúa A, Failloux AB,  
648 Matthijssens J. 2019. Stable distinct core eukaryotic viromes in different mosquito  
649 species from Guadeloupe, using single mosquito viral metagenomics. *Microbiome*  
650 7:121.
- 651 73. Pettersson, Shi, Eden, Holmes, Hesson. 2019. Meta-Transcriptomic Comparison of the  
652 RNA Viromes of the Mosquito Vectors *Culex pipiens* and *Culex torrentium* in  
653 Northern Europe. *Viruses* 11:1033.
- 654
- 655

656 **Figures**

657

**A)**

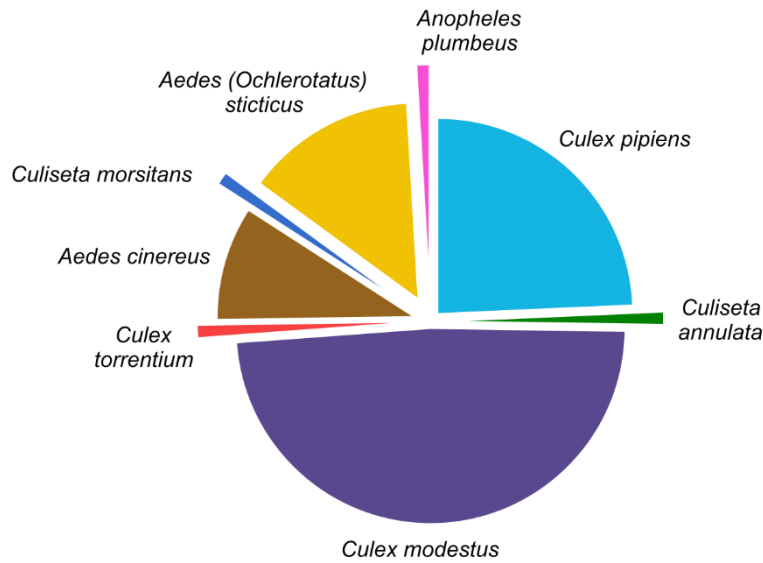

**B)**

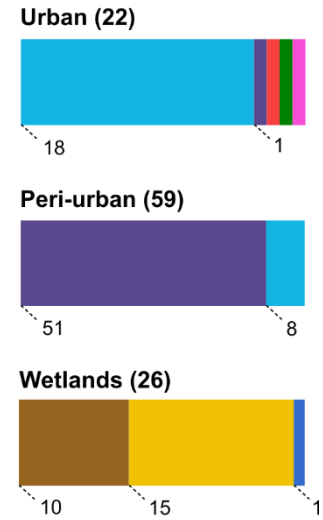

658

659 **Figure 1. Mosquito species collected in Leuven, Belgium in 2019.** A) Distribution of  
660 mosquito species captured during the summer of 2019 across all locations sampled in Leuven.  
661 B) Distribution of mosquito species across habitat types in Leuven. Mosquito species are  
662 marked in different colors. The number of specimens is indicated in the bar chart.

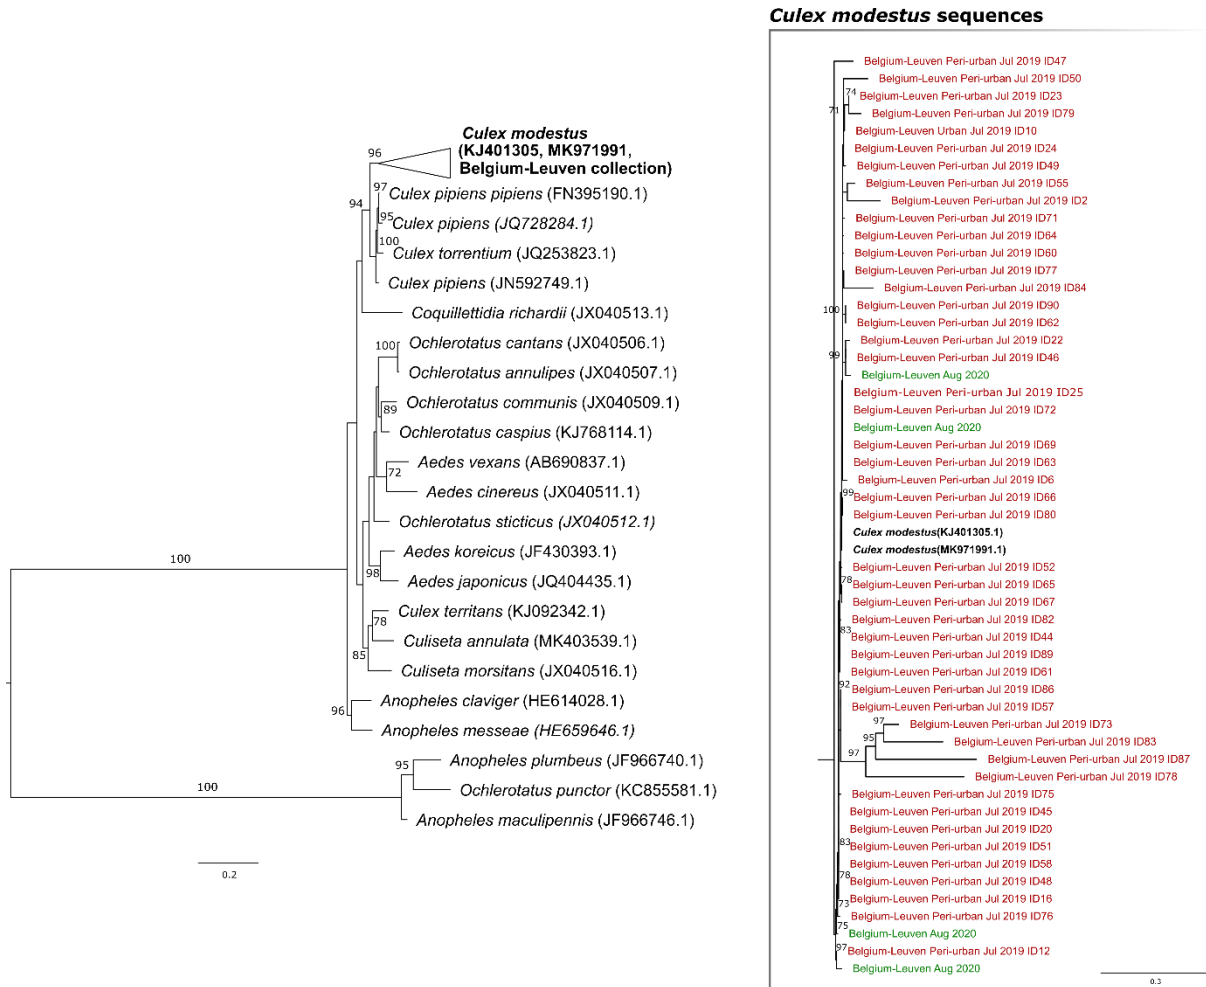

663  
664 **Figure 2. ML tree of the COI sequences of 21 Culicid species.** Sequences derived from  
665 mosquitoes collected in Leuven are collapsed with the reference sequences for *Cx. modestus*.  
666 The collapsed branched is expanded in the panel on the right. Bootstrap values above 70% are  
667 shown above the branch points.  
668  
669

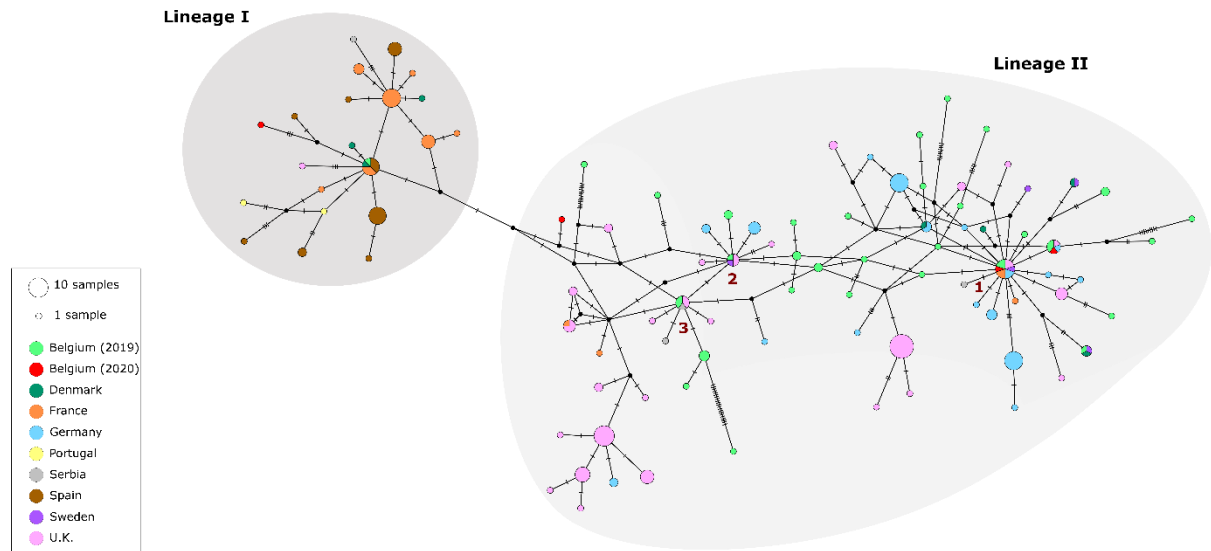

670  
671 **Figure 3. Median-joining network constructed with 228 COI sequences of *Cx. modestus***  
672 **from 9 countries in Europe.** Each circle represents a haplotype. The size of the circle  
673 corresponds to the number of specimens sharing that specific haplotype. Each country is  
674 represented by a color described in the legend. Mosquito collections in Belgium are separated  
675 per year to visualize the allocation of haplotypes in the network.

676

A)

| Location   | Pool ID | Mosquito species                      | n  |
|------------|---------|---------------------------------------|----|
| Urban      | 1       | <i>Culex pipiens</i>                  | 6  |
|            |         | <i>Culex modestus</i>                 | 1  |
|            |         | <i>Culex torrentium</i>               | 1  |
|            | 2       | <i>Culex pipiens</i>                  | 12 |
|            | 3       | <i>Anopheles plumbeus</i>             | 1  |
|            |         | <i>Culiseta annulata</i>              | 1  |
| Peri-urban | 4       | <i>Culex modestus</i>                 | 5  |
|            |         | <i>Culex pipiens</i>                  | 15 |
|            | 5       | <i>Culex modestus</i>                 | 17 |
|            | 6       | <i>Culex pipiens</i>                  | 3  |
|            |         | <i>Culex modestus</i>                 | 19 |
| Wetlands   | 7       | <i>Aedes cinereus</i>                 | 10 |
|            | 8       | <i>Aedes (Ochlerotatus) sticticus</i> | 15 |
|            |         | <i>Culiseta morsitans</i>             | 1  |

B)

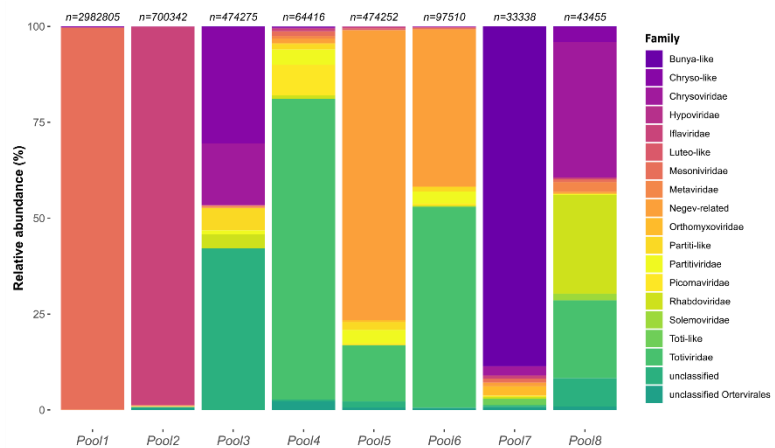

677  
678 **Figure 4. Summary information and viral composition of sequenced samples.** A) Location,  
679 mosquito species and number of specimens present in each of the sequenced pools. B) Barplots  
680 representing the abundance of reads belonging to distinct viral families per pool. The number  
681 of eukaryotic viral reads per pool is given on top of each bar.

682

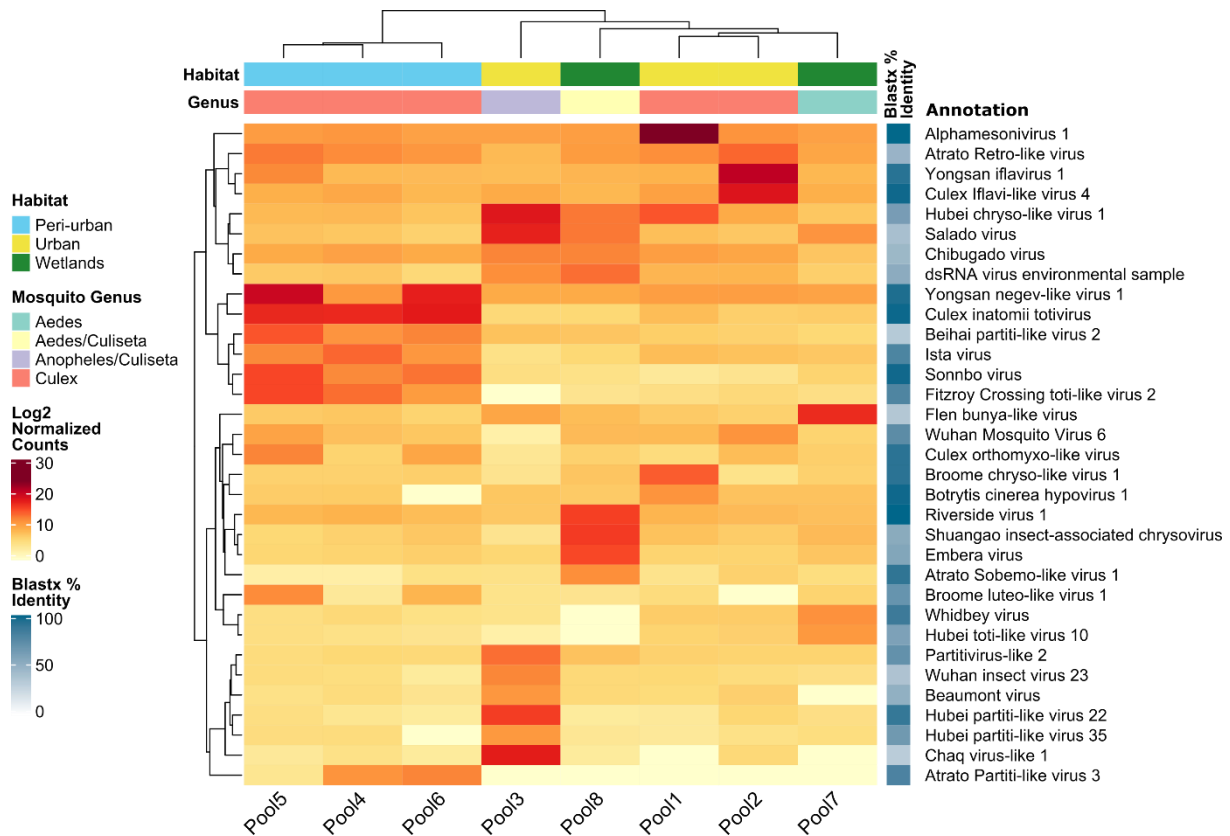

683

684 **Figure 5. Heatmap of normalized read counts for eukaryotic viruses.** The heatmap shows  
685 the normalized count on log<sub>2</sub> scale of reads mapping to the assembled contigs of each eukaryotic  
686 virus. Next to the taxonomic annotation, obtained by DIAMOND and KronaTools, the average  
687 BLASTx identity for all contigs representing a viral species is depicted by the shaded blue  
688 boxes. Hierarchical clustering of the columns is based on the Bray-Curtis distance matrix  
689 calculated from the normalized read counts.



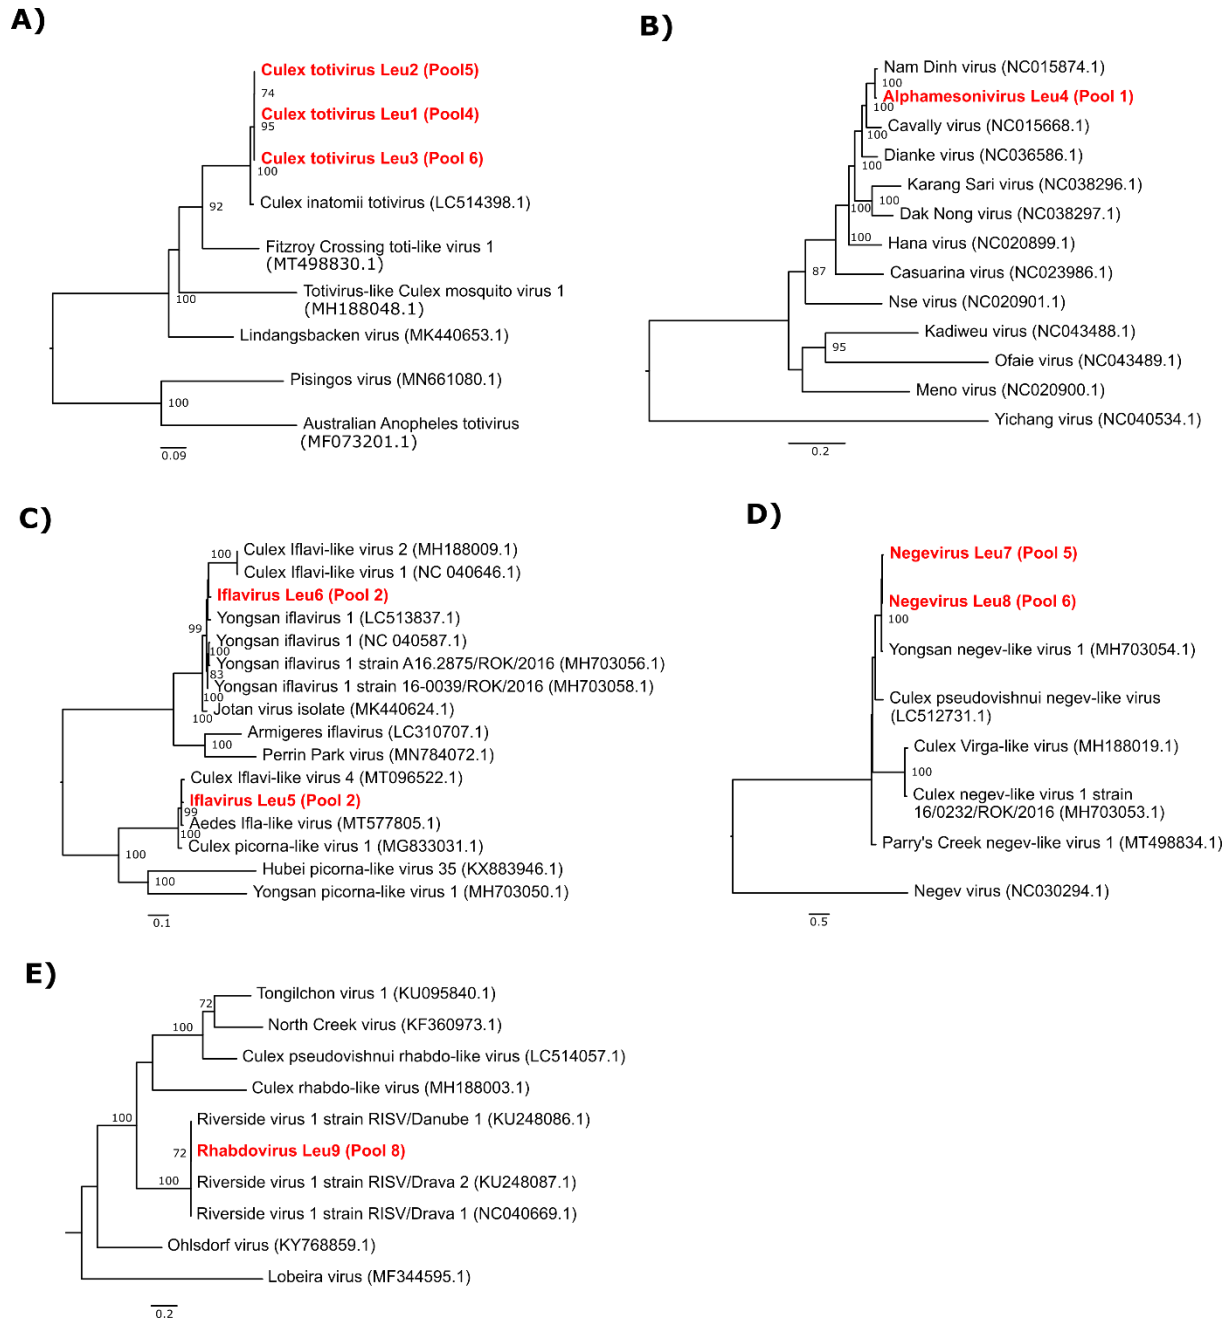

690

691 **Figure 6. (Near-) complete meta-assembled genomes identified in mosquitoes collected**  
 692 **during the summer of 2019.** Bootstrap support values are shown next to the nodes. Complete  
 693 MAGs are coloured in red. A) Midpoint-rooted ML tree of all complete genomes related to  
 694 *Culex inatommii* totivirus, selected after BLASTn. B) Midpoint-rooted ML tree of all  
 695 *Mesoniviridae* family members. C) Midpoint-rooted ML tree of all complete genomes related  
 696 to our Yongsan iflavirus 1 and *Culex* Iflavi-like virus 4 genomes, selected after BLASTn. D)  
 697 ML tree of all complete genomes related to Yongsan negev-like virus 1, selected after BLASTn.

698 Negevirus was used as the outgroup. E) Midpoint-rooted ML tree of all complete genomes

699 related to the recovered Riversidevirus 1.

700

701 **Tables**

702 **Table 1. Haplotype and nucleotide diversity of *Cx. modestus* from 9 countries in Europe.**

| <b>Population</b> | <b><i>n</i></b> | <b>Number of haplotypes</b> | <b>Haplotype diversity</b> | <b>Nucleotide diversity</b> |
|-------------------|-----------------|-----------------------------|----------------------------|-----------------------------|
| Belgium           | 44              | 33                          | 0.9852 ± 0.0082            | 0.0270 ± 0.0136             |
| Denmark           | 7               | 7                           | 1.0000 ± 0.0764            | 0.0174 ± 0.0103             |
| France            | 28              | 11                          | 0.8598 ± 0.0462            | 0.0069 ± 0.0039             |
| Germany           | 42              | 17                          | 0.9013 ± 0.0278            | 0.0113 ± 0.0060             |
| Portugal          | 2               | 2                           | 1.0000 ± 0.5000            | 0.0065 ± 0.0073             |
| Serbia            | 4               | 4                           | 1.0000 ± 0.1768            | 0.0182 ± 0.0125             |
| Spain             | 22              | 8                           | 0.8182 ± 0.0586            | 0.0058 ± 0.0034             |
| Sweden            | 5               | 5                           | 1.0000 ± 0.1265            | 0.0085 ± 0.0058             |
| UK                | 74              | 28                          | 0.9252 ± 0.0176            | 0.0107 ± 0.0057             |

703

704
